# Supplementary material for: In situ transfer of CH3NH3PbI3 single crystals in mesoporous scaffolds for efficient perovskite solar cells
Source: Royal Society of Chemistry journal article supplement (doi:10.1039/c9sc04900b), 2019-11-20
Supplement: c9sc04900b1.pdf [file c9sc04900b1.pdf]

## Supplementary Information

### ***In situ* transfer of CH<sub>3</sub>NH<sub>3</sub>PbI<sub>3</sub> single crystals in mesoporous scaffolds for efficient perovskite solar cells**

*YanJun Guan<sup>a†</sup>, Mi Xu<sup>a†</sup>, Wenhao Zhang<sup>a</sup>, Da Li<sup>a</sup>, Xiaomeng Hou<sup>a</sup>, Li Hong<sup>a</sup>, Qifei Wang<sup>a</sup>, Zhihui Zhang<sup>a</sup>, Anyi Mei<sup>a</sup>, Min Chen<sup>b</sup>, Yuanyuan Zhou<sup>b</sup>, Nitin P. Padture<sup>b</sup>, Yue Hu<sup>a\*</sup>, Yaoguang Rong<sup>a\*</sup>, Hongwei Han<sup>a</sup>*

*<sup>a</sup>Michael Grätzel Center for Mesoscopic Solar Cells, Wuhan National Laboratory for Optoelectronics, China-EU Institute for Clean and Renewable Energy, Huazhong University of Science and Technology, Wuhan 430074, Hubei, P. R. China*

*<sup>b</sup>School of Engineering, Brown University, Providence, RI 02912, United States*

Email: *ygrong@hust.edu.cn; yuehu@hust.edu.cn*

These authors contributed equally to this work.

## ***Experimental***

### *Growth of MAPbI<sub>3</sub> seed crystals*

A mixture of 1.2 mmol of methylammonium iodide (MAI, purchased from Sigma) and 1.2 mmol of PbI<sub>2</sub> (Across) was dissolved in 1 mL  $\gamma$ -butyrolactone (GBL, Sigma), and then the solution was heated to 110 °C in the oven. Within half an hour, a large number of MAPbI<sub>3</sub> seed crystals, 1-2 mm in size, appeared at the bottom of the container. They were collected for subsequent experiments (**Fig. S1a**).

### *Growth of large-size MAPbI<sub>3</sub>*

The collected 1~2 mm sized seed crystals were placed in the aforementioned solution and grown in an oven at 110 °C. The small-sized single crystal appearing in solution was removed periodically, and the single crystal having a size of 5~7 mm was obtained after 1 to 2 days. By repeating this method, we can obtain larger sized single crystals.<sup>1</sup> Subsequently, the top solvent was removed by a syringe, and the crystals were rinsed in ether. Different sizes of MAPbI<sub>3</sub> single crystal are shown in **Fig. S1b**.

### *Device fabrication*

The FTO-coated glass substrates (Tec 15, Pilkington) were etched by a laser before being ultrasonically cleaned with detergent, deionized water, acetone and ethanol. A compact layer of TiO<sub>2</sub> was deposited on the patterned substrates by spray pyrolysis deposition at 450 °C using a titanium diisopropoxide bis(acetylacetonate) solution diluted in ethanol (1:39, volume ratio). Subsequently the 500 nm mesoporous TiO<sub>2</sub> layer, the 1.5  $\mu$ m ZrO<sub>2</sub> spacer layer and 13  $\mu$ m graphite/carbon black electrodes were screen-printed onto FTO glass layer by layer, as we previously reported.<sup>2</sup> The films were sintered at 500 °C, 500 °C and 400 °C for 30 min, respectively.

### *Drop-casting of perovskite precursor*

The perovskite precursor was prepared by dissolving 553 mg of  $\text{PbI}_2$  and 190 mg of MAI in 1 mL DMF. The precursor solution was stirred for 12 h at 50 °C to produce a homogeneous dispersion. For drop-casting method, 2.5  $\mu\text{L}$  of precursor solution was filled in a blank device and annealed at 100 °C for 10 minutes. (For spin-coating testing perovskite film, 50  $\mu\text{L}$  of precursor solution was spin-casted onto the  $\text{ZrO}_2$  spacer layer at 2000 rpm for 30s and annealed at 100 °C for 10 minutes.)

### *In-situ crystal transfer process*

We developed a homemade prototype reactor to control the  $\text{CH}_3\text{NH}_2$  ( $\text{MA}^0$ ) vapor pressure (**Fig. S1**). Reactor primarily composes of MA source and  $\text{N}_2$  in cylinder containers, a drier (filled with silica gel), a flowmeter for controlling the pressure of  $\text{MA}^0$ , reaction chamber with gas manometer, as well as a vacuum pump. There are three valves to control the opening and closing of the gas path. The large-sized single crystal was ground into powders, and then 2.5 mg of the crystal powders were placed on the active area of each blank device. The as-prepared 20 blank devices were loaded into the reactor. The reactor was firstly pumped to -0.1 MPa to remove the air, and then refilled with  $\text{MA}^0$  gas with a pressure of  $\sim 0.015$  MPa. The whole process was performed at room temperature of 25 °C. Once the  $\text{MA}^0$  gas was refilled in the reactor, the  $\text{MAPbI}_3$  crystal powders began to turn into liquid-state phase  $\text{MAPbI}_3 \cdot x\text{MA}^0$ . After 2~3 minutes, the mixture of  $\text{MAPbI}_3$  crystals and liquid-state phase  $\text{MAPbI}_3 \cdot x\text{MA}^0$  completely converted into transparent colloidal liquid-state phase  $\text{MAPbI}_3 \cdot x\text{MA}^0$ , spreading and penetrating in the mesoporous scaffolds. After the penetration of the colloidal liquid-state phase  $\text{MAPbI}_3 \cdot x\text{MA}^0$ , the reactor was refilled by  $\text{N}_2$ . The transparent colloidal liquid-state phase  $\text{MAPbI}_3 \cdot x\text{MA}^0$  slowly transformed to dark brown  $\text{MAPbI}_3$ , forming high-quality perovskite absorber in the scaffold. The perovskites deposited devices

were stored in the dark and at room temperature for several days to enable complete release of MA<sup>0</sup> gas and transformation from MAPbI<sub>3</sub>·xMA<sup>0</sup> to MAPbI<sub>3</sub>.

### *Characterization*

Photocurrent density-voltage ( $J-V$ ) characteristics were measured using a Keithley 2400 source meter and a Newport solar simulator (model 91192-1000) giving light with AM 1.5 G spectral distribution, which was calibrated using a certified reference solar cell to an intensity 100 mW cm<sup>-2</sup>. A black mask with a circular aperture (0.1 cm<sup>2</sup>) was applied on top of the cell. The scan rate was 100 mV s<sup>-1</sup> and the scan direction was from open-circuit to short-circuit (reverse scan) and from short-circuit to open-circuit (forward scan). UV-visible spectra were performed on PerKinElmer Lambda 950 spectrophotometer. The X-ray diffraction (XRD) spectra were obtained using a Bruker D8 Advance X-ray diffractometer with Cu K<sub>α</sub> radiation ( $\lambda=1.5418\text{\AA}$ ). The 2D XRD patterns of the prepared thin films were collected using a 2D detector (Vantec 500, Germany) using Cu K<sub>α</sub> radiation ( $\lambda=1.5418\text{\AA}$ ), with 10° step and 360 s/step dwelling time. The top-view and cross-sectional scanning electron microscopy (SEM) image of the perovskite-infiltrated triple layer was obtained by a field-emission scanning electron microscope (Nova NanoSEM 450, FEI). The film thickness was measured by a profilometer (Dektak 150, VeecoInstruments Inc.). Time-resolved photoluminescence (TR-PL) decay transients were measured at 780 nm using excitation with a 478 nm light pulse from a HORIBA Scientific DeltaPro fluorimeter. The steady-state photoluminescence spectra were measured by a Horiba Jobin Yvon LabRAM HR800s with a 532 nm wavelength excitation source. Electrochemical impedance spectroscopy (EIS) of the devices was performed on ZAHNER ENNIUM electrochemical workstations in the frequency range from 100 mHz to 4 MHz.

This is a brief description of the time-resolved imaging of the Perovskite samples by ISS Q2. The Q2 laser scanning confocal system is coupled a Nikon TE2000 microscope equipped with the Nikon 60X/1.2NA WI objective. An ISS 488-nm pulsed diode laser was used as the excitation source. For measuring the photoluminescence lifetimes of different Perovskite samples, the laser repetition rate was set to be 1 MHz for spin-coating sample or 100 KHz for ICT sample. The emission light after a 650-nm long-pass filter was collected by a single photon counting module avalanche photodiode by Excelitas (model: SPCM-AQRH-14). For each sample, images were acquired at both the sample surface and inside via tuning the focus in the z axis of the objective lens; at each position field (20 $\mu$ m x 20 $\mu$ m) was scanned using Galvo mirrors at the sampling rate of 256 x 256 pixels. Both the laser and the scanner were synchronized to the data acquisition unit of FastFLIM by ISS to record the time-resolved data at each pixel of the image. The images containing both intensity and lifetime information are analyzed by the ISS 64-bit VistaVision software.

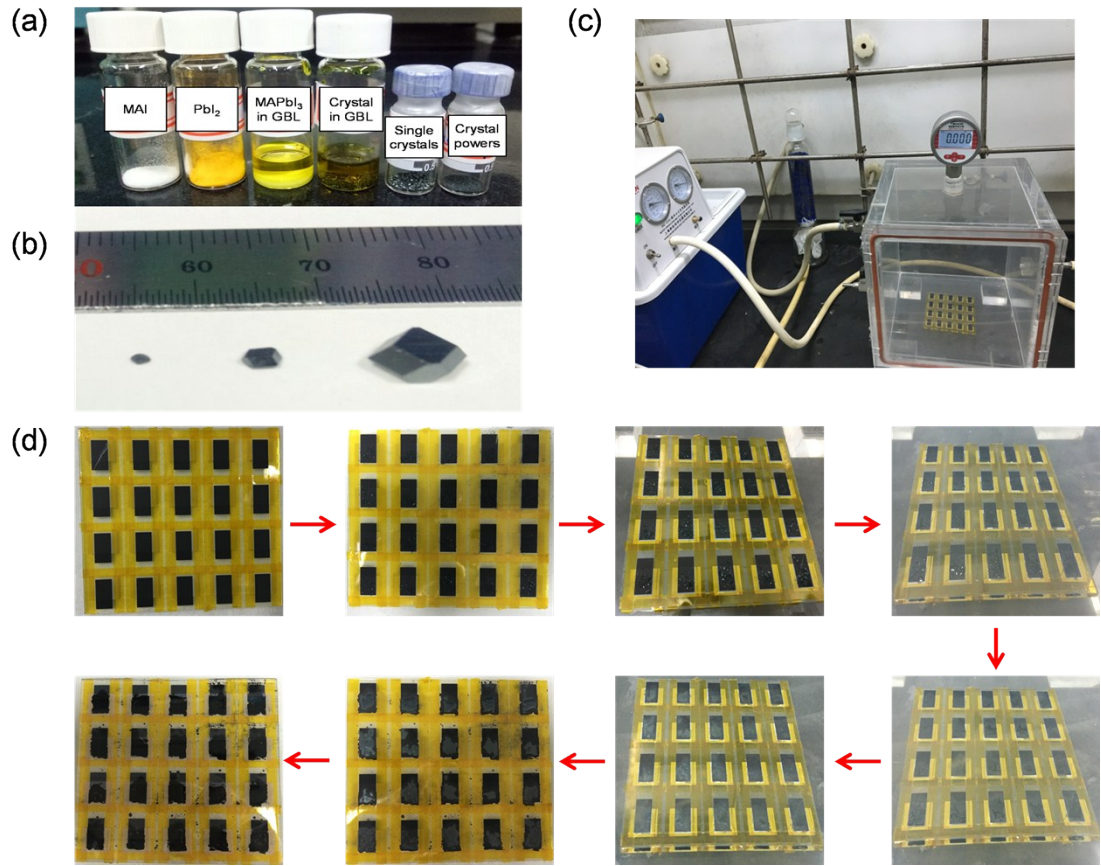

**Fig. S1** (a) Processes of seed crystal preparation and large crystal growth. (b) Growth of different sizes of MAPbI<sub>3</sub> single crystals. (c) Experimental equipment of ICT method. (d) Experimental process of methylamine gas assisted the powders of MAPbI<sub>3</sub> single crystal deposited into the blank device based on TiO<sub>2</sub>/ZrO<sub>2</sub>/C structure in situ under room temperature.

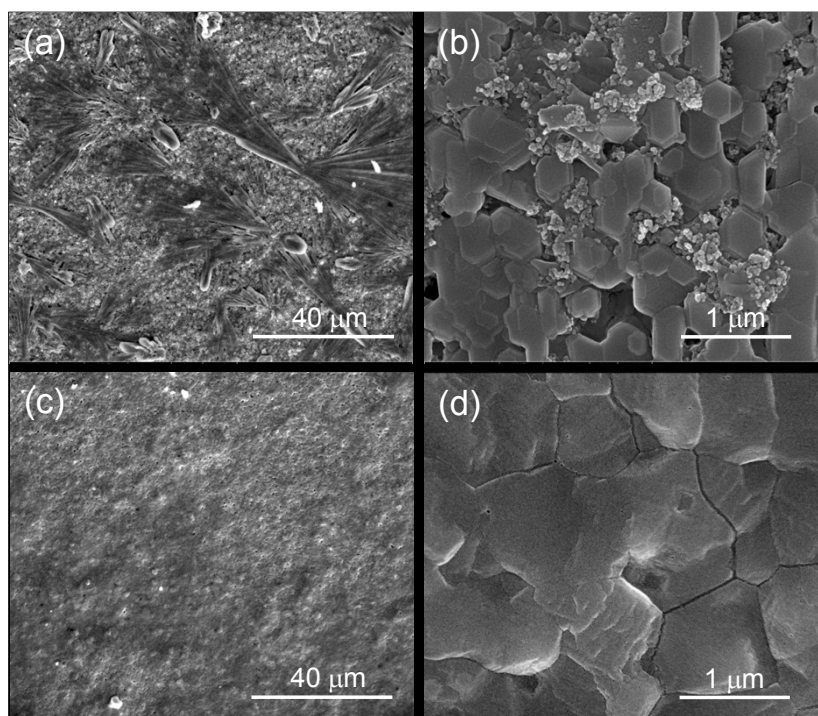

**Fig. S2** Top-view SEM images of MAPbI<sub>3</sub> films deposited on mesoporous TiO<sub>2</sub> by drop-casting method (a, b) and ICT method (c, d).

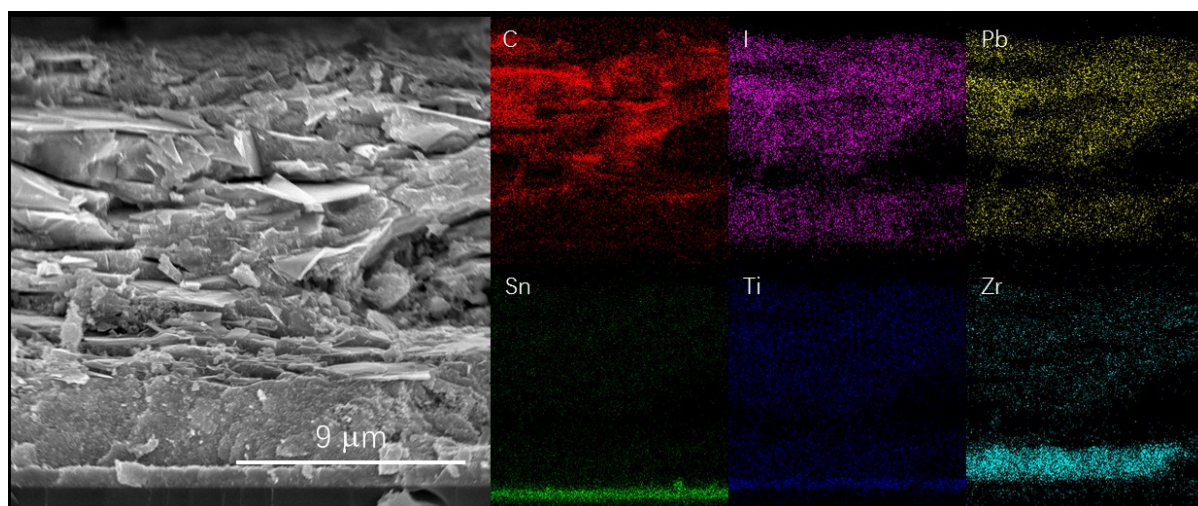

**Fig. S3** Cross-section SEM image of representative device fabricated by ICT method, and its EDX elemental mapping of C, I, Pb, Sn, Ti and Zr.



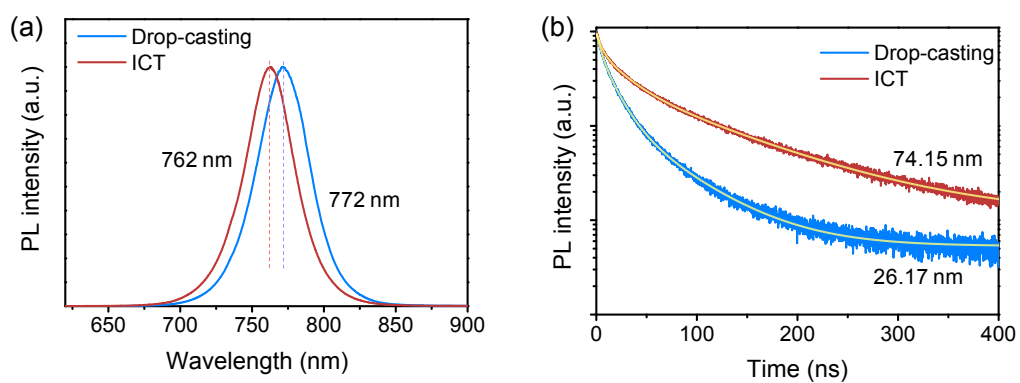

**Fig. S4** Comparison of normalized steady-state photoluminescence spectra (a) and the time-resolved photoluminescence spectra (b) of MAPbI<sub>3</sub> films on insulating ZrO<sub>2</sub> scaffold for ICT and drop-casting methods.

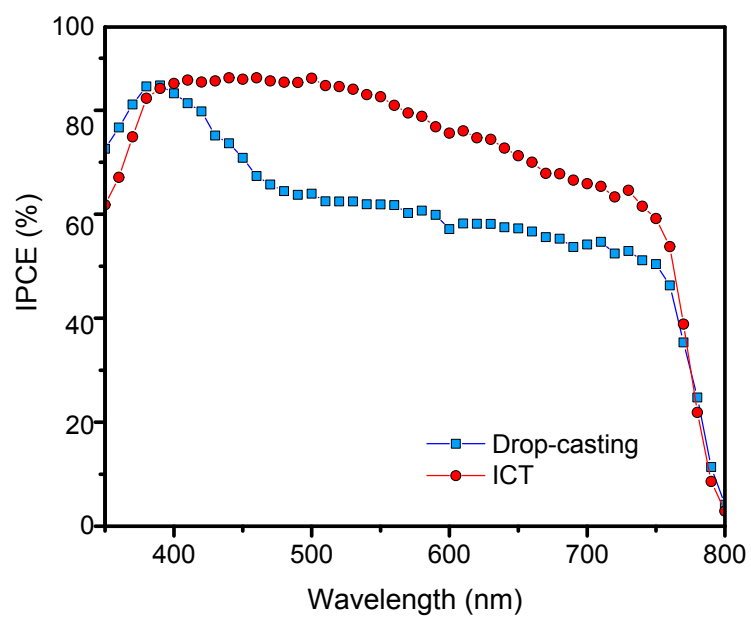

**Fig. S5** IPCE spectra of the devices fabricated with ICT and drop-casting method.

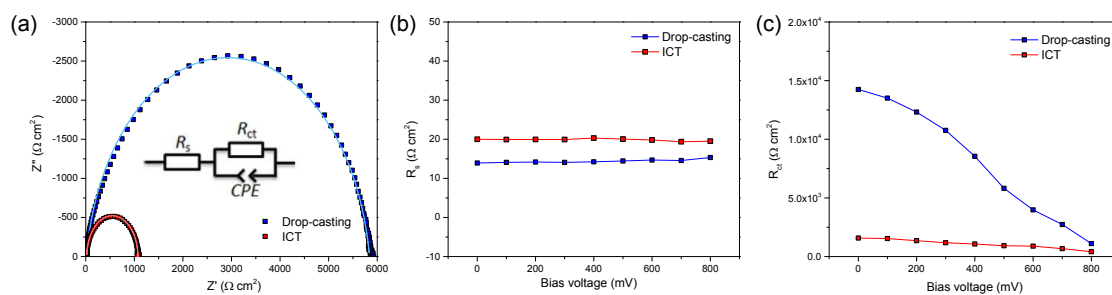

**Fig. S6** (a) Nyquist plots of devices fabricated in different methods with a bias of -0.5 V in the dark. (b) Series resistance ( $R_s$ ), (c) charge transfer resistance ( $R_{CT}$ ) as a function of voltage for the mesoscopic perovskite solar cells prepared by two methods.

## Reference

1. Y. Liu, Z. Yang, D. Cui, X. Ren, J. Sun, X. Liu, J. Zhang, Q. Wei, H. Fan, F. Yu, X. Zhang, C. Zhao and S. Liu, *Advanced Materials*, 2015, **27**, 5176-5183.
2. Z. Wan, M. Xu, Z. Fu, D. Li, A. Mei, Y. Hu, Y. Rong and H. Han, *Frontiers of Optoelectronics*, 2019, DOI: 10.1007/s12200-019-0904-7.
